# Supplementary material for: Intercalation of lanthanide cations to a layer-like metal–organic framework for color tunable white light emission
Source: Royal Society of Chemistry journal article supplement (doi:10.1039/c4dt02714k), 2014-11-07
Supplement: c4dt02714k1.pdf [file c4dt02714k1.pdf]

## Electronic Supporting Information

### Intercalation of lanthanide cations to a layer-like metal-organic framework for color tunable and white light emission

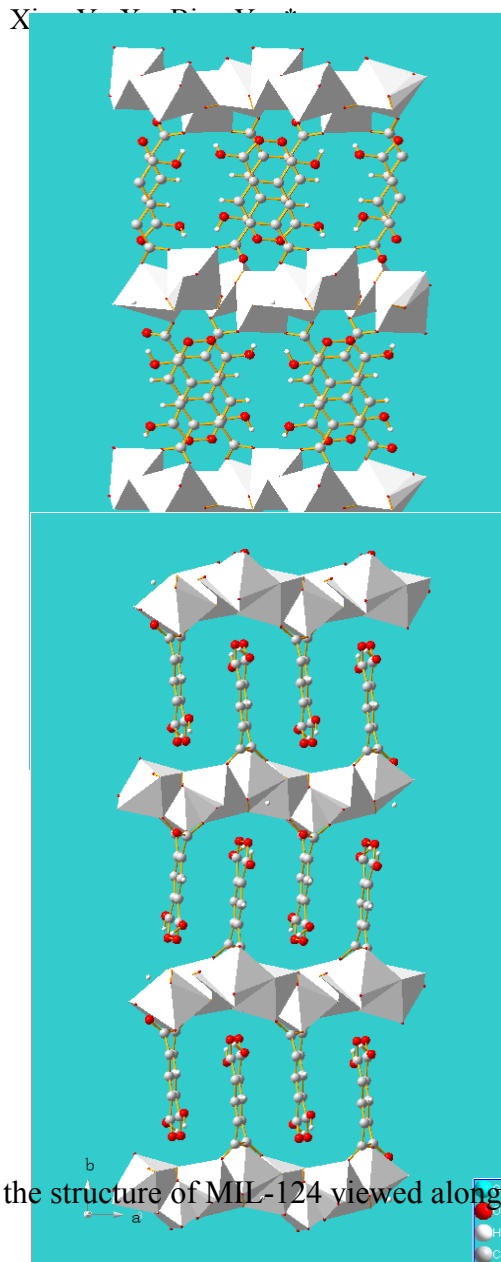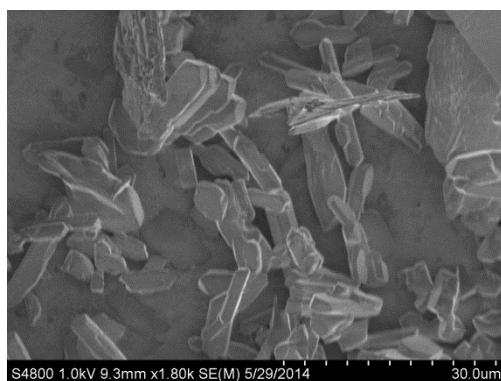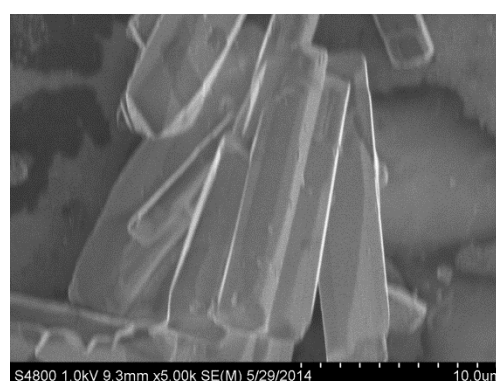

Figure S2 SEM image of MIL-124.

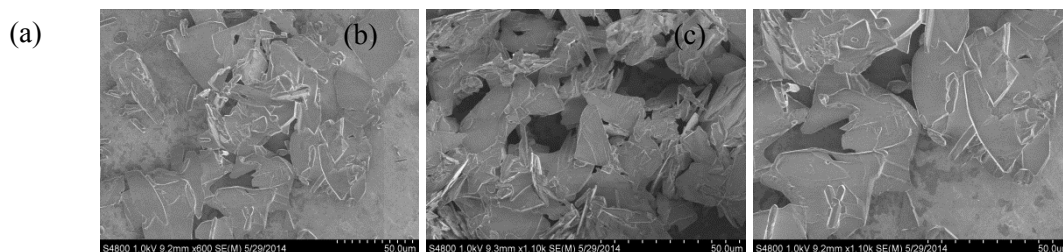

Figure S3 SEM image of MIL-124@Eu<sup>3+</sup> (a), MIL-124@Tb<sup>3+</sup> (b), MIL-124@Eu<sup>3+</sup>/Tb<sup>3+</sup> (c).

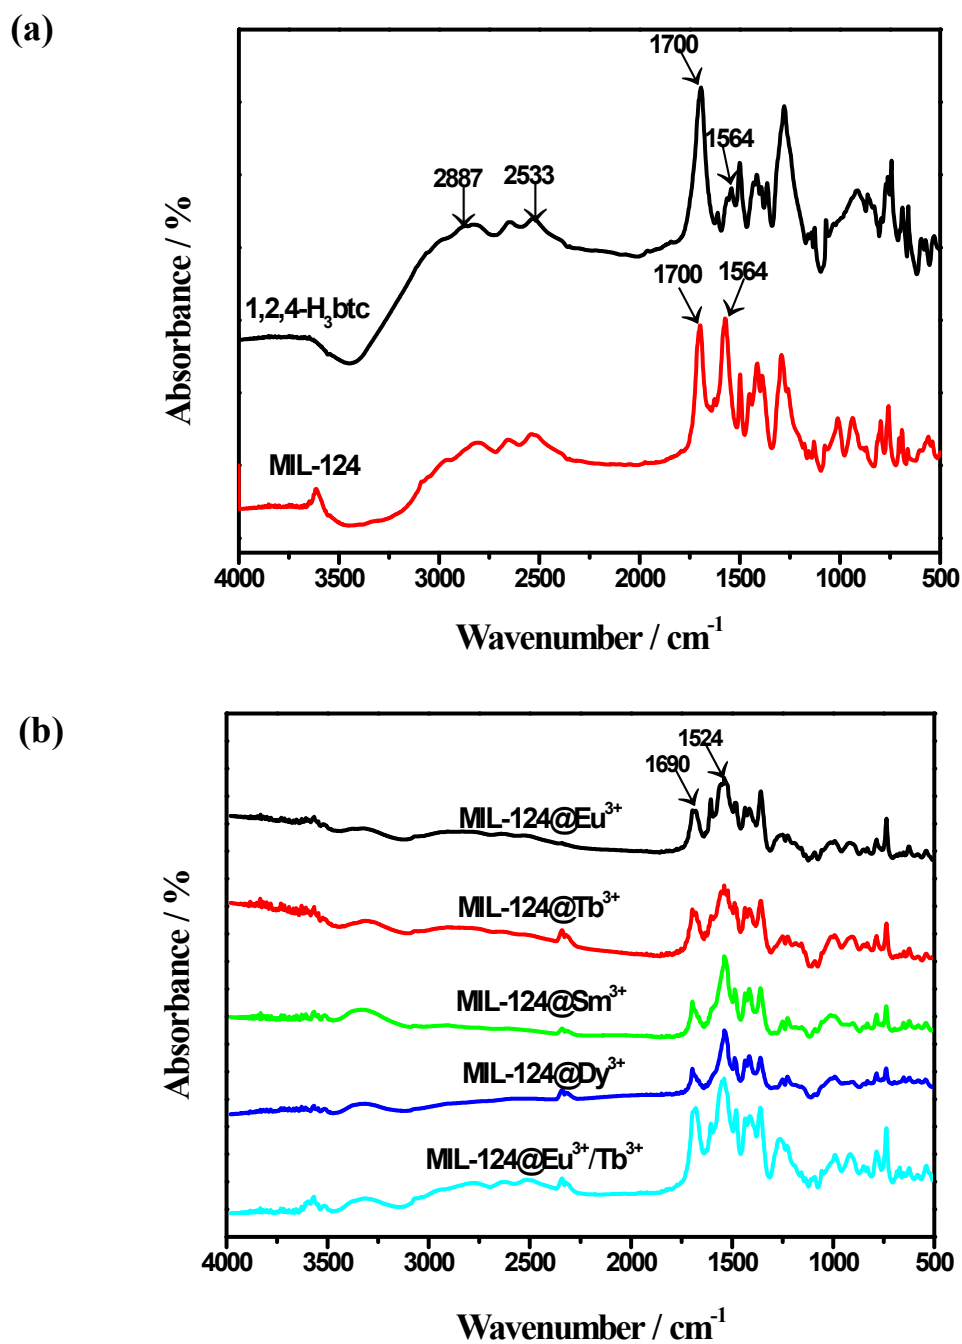

Figure S4 IR spectra of 1,2,4-H<sub>3</sub>btc and MIL-124(a), MIL-124@Ln<sup>3+</sup> (Ln = Eu, Tb, Sm, Dy, Eu/Tb).

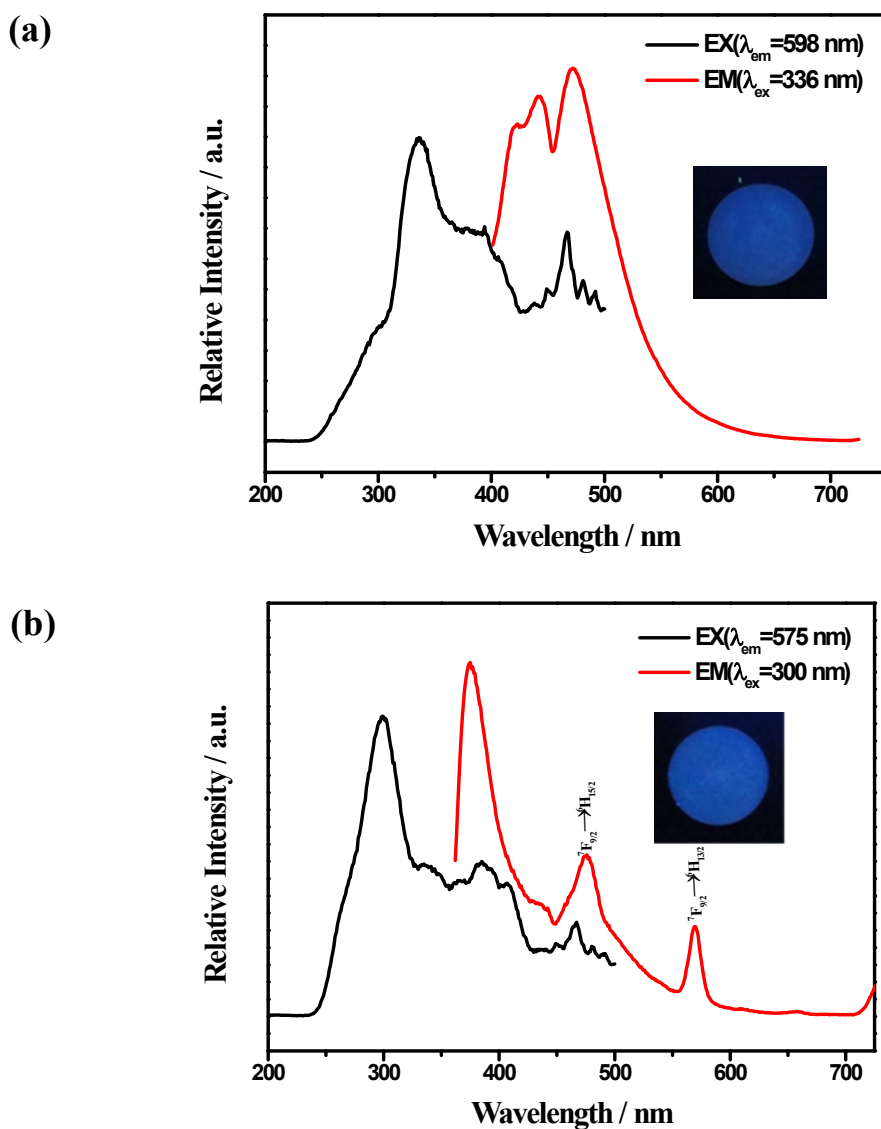

**Figure S5** Excitation (black line) and emission (red line) spectra of MIL-124@Sm<sup>3+</sup> (a) and MIL-124@Dy<sup>3+</sup> (b). The insets are the corresponding luminescence pictures under UV-light irradiation of 254 nm

**Table S1** The corresponding CIE coordinate of the MIL-124@Eu<sup>3+</sup> (different concentration and different excitation wavelength) and MIL-124@Eu<sup>3+</sup>/Tb<sup>3+</sup> (different excitation wavelength)

| Sample                   | CIE X, Y       | Sample               | CIE X, Y       | Sample                                 | CIE X, Y       |
|--------------------------|----------------|----------------------|----------------|----------------------------------------|----------------|
| MOF@Eu <sup>3+</sup>     |                | MOF@Eu <sup>3+</sup> |                | MOF@Eu <sup>3+</sup> /Tb <sup>3+</sup> |                |
| 10 <sup>-3</sup> (mol/L) | 0.5066, 0.2761 | 310 nm               | 0.5066, 0.2761 | 297 nm                                 | 0.3693, 0.3362 |
| 10 <sup>-4</sup> (mol/L) | 0.3935, 0.2092 | 320 nm               | 0.4029, 0.2321 | 305 nm                                 | 0.3155, 0.2969 |
| 10 <sup>-5</sup> (mol/L) | 0.2311, 0.1205 | 330 nm               | 0.2905, 0.2083 | 315 nm                                 | 0.2679, 0.2506 |
| --                       | --             | 340 nm               | 0.2058, 0.1662 | 320 nm                                 | 0.2194, 0.2209 |

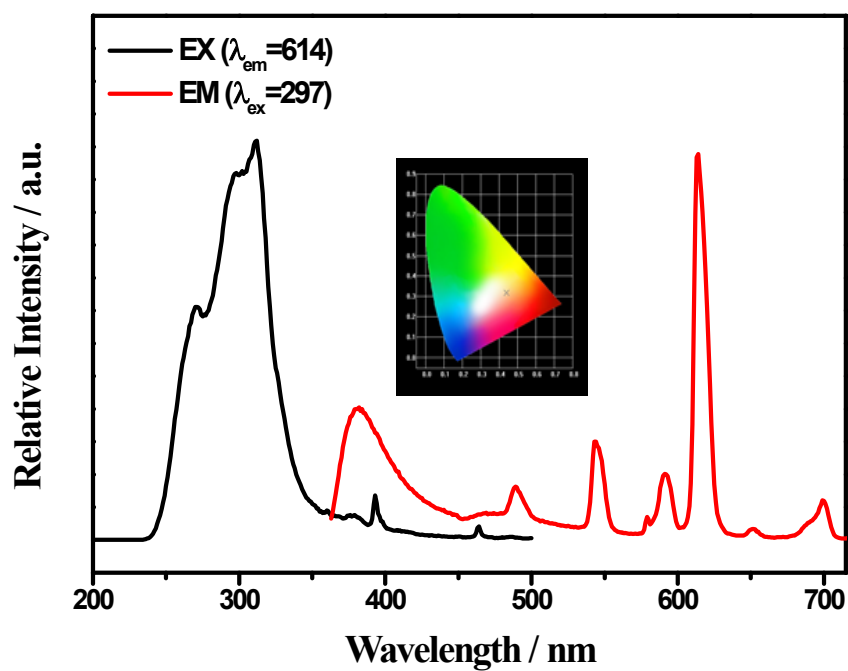

**Figure S6** Excitation (black line) and emission (red line) spectra of MIL-124@Eu<sup>3+</sup>/Tb<sup>3+</sup> exciting at 614 nm and the inset showing the corresponding CIE chromaticity diagram.
